1 **TGF- $\beta$ 2, catalase activity, H<sub>2</sub>O<sub>2</sub> output and metastatic**  
2 **potential of diverse types of tumour**

3 Malak Haidar<sup>1,2,3\*</sup>, Mehdi Metheni<sup>1,2\*</sup>, Frederic Batteux<sup>1,4</sup> and Gordon  
4 Langsley<sup>1,2#</sup>

5 <sup>1</sup>Inserm U1016, Cnrs UMR8104, Cochin Institute, Paris, 75014 France.

6 <sup>2</sup>Laboratoire de Biologie Cellulaire Comparative des Apicomplexes, Faculté de Médecine,  
7 Université Paris Descartes - Sorbonne Paris Cité, France.

8 <sup>3</sup>Present address: Pathogen Genomics Laboratory, Computational Bioscience Research  
9 Center, King Abdullah University of Science and Technology (KAUST), Thuwal-23955-  
10 6900, Kingdom of Saudi Arabia.

11 <sup>4</sup>Laboratoire de Stress Oxydant, Prolifération Cellulaire et Inflammation, Faculté de  
12 Médecine, Université Paris Descartes - Sorbonne Paris Cité, France.

13 \*co-first authors, equally contributed

14 #Corresponding author: Gordon Langsley; Tel: +33 140516592; Fax: +33 140516570;  
15 Email: [gordon.langsley@inserm.fr](mailto:gordon.langsley@inserm.fr)

16 Keywords: *Theileria*, TGF- $\beta$ 2, ROS, CREB, catalase, human cancer, tumorigenesis

17 Running title: TGF- $\beta$ 2 and catalase activity

18 The authors declare they have no competing financial interests in relation to the work  
19 described.

TGF- $\beta$ 2 and catalase activity

20 **Abstract:**

21 *Theileria annulata* is a protozoan parasite that infects and transforms bovine  
22 macrophages causing a myeloid-leukaemia-like disease called tropical theileriosis.  
23 TGF- $\beta$ 2 is highly expressed in many cancer cells and is significantly increased in  
24 *Theileria*-transformed macrophages, as are levels of Reactive Oxygen Species (ROS),  
25 notably H<sub>2</sub>O<sub>2</sub>. Here, we describe the interplay between TGF- $\beta$ 2 and ROS in cellular  
26 transformation. We show that TGF- $\beta$ 2 drives expression of *catalase* to reduce the  
27 amount of H<sub>2</sub>O<sub>2</sub> produced by *T. annulata*-transformed bovine macrophages, as well as  
28 by human lung (A549) and colon cancer (HT-29) cell lines. *Theileria*-transformed  
29 macrophages attenuated for dissemination express less catalase and produce more  
30 H<sub>2</sub>O<sub>2</sub>, but regain both virulent migratory and matrigel traversal phenotypes when  
31 stimulated with TGF- $\beta$ 2, or catalase that reduce H<sub>2</sub>O<sub>2</sub> output. Increased H<sub>2</sub>O<sub>2</sub> output  
32 therefore, underpins the aggressive dissemination phenotype of diverse tumour cell  
33 types, but in contrast, too much H<sub>2</sub>O<sub>2</sub> can dampen dissemination.

## TGF- $\beta$ 2 and catalase activity

### 34 **Introduction**

35 TGF- $\beta$  (Transforming Growth Factor beta) is a pleiotropic cytokine that is involved in  
36 diverse cellular processes such as proliferation, apoptosis and motility (1, 2). In  
37 advanced cancer, TGF- $\beta$  acts as an oncogenic factor that promotes tumour  
38 progression. Three isoforms have been defined of which TGF- $\beta$ 2 is highly expressed  
39 in many cancer cell lines, especially those showing a high dissemination potential.  
40 *Theileria annulata* parasitizes bovine macrophages and transforms them into  
41 disseminating tumours that cause a myeloid-leukemia-like disease called tropical  
42 theileriosis. However, *T. annulata*-transformed macrophage dissemination can be  
43 attenuated by multiple *in vitro* passages and attenuated macrophages are used as live  
44 vaccines in countries endemic for tropical theileriosis (3).

45 TGF- $\beta$ 2 levels are high in *Theileria*-transformed macrophages and this correlates with  
46 susceptibility to disease (4). Upon attenuation *in vitro*, the Ode vaccine line displays  
47 both reduced TGF- $\beta$ 2 expression and dissemination, which are re-established by  
48 addition of exogenous TGF- $\beta$  (4); observations consistent with a pro-metastatic role  
49 for TGF- $\beta$ 2 in the virulence of *Theileria*-transformed macrophages. Furthermore,  
50 excessive cellular oxidative stress diminishes the virulence of *Theileria*-transformed  
51 macrophages, as attenuated macrophages produce more H<sub>2</sub>O<sub>2</sub> (5). However,  
52 heightened reactive oxygen species (ROS) have been reported to increase TGF- $\beta$   
53 expression and stimulate release of TGF- $\beta$  from latent complexes (6, 7). Although this  
54 might contribute to TGF- $\beta$ 2 production by virulent macrophages it does not explain  
55 why attenuated macrophages that produce more ROS express less TGF- $\beta$ 2 (4, 5).  
56 TGF- $\beta$ 2-signalling induces the transcription factor CREB in *Theileria*-transformed  
57 macrophages and CREB activity diminishes upon attenuation of macrophage

## TGF- $\beta$ 2 and catalase activity

58 virulence (8). The cyclic AMP response element-binding protein (CREB) is a  
59 transcription factor of general importance in diverse cell types (9). CREB signalling is  
60 associated with cancer development and poor clinical outcome in leukemogenesis  
61 (10), but it is not known if CREB is a player in ROS regulation.

62 Elevated rates of ROS production have been described for human cancer cells, where  
63 excessive ROS underpins many aspects of tumour development and progression (11).  
64 However, tumours also express increased levels of antioxidant proteins to detoxify  
65 ROS such as superoxide dismutases (SODs), catalase, peroxiredoxins, the glutathione  
66 system that includes glutathione (GSH), glutathione reductase and glutathione  
67 peroxidases (GPx) (11). Here, we focus on catalase that detoxifies hydrogen peroxide  
68 ( $H_2O_2$ ) by turning it into water and oxygen. We report that TGF- $\beta$ 2 induces CREB  
69 transactivation to promote catalase transcription that leads to increased catalase  
70 activity and reduction in  $H_2O_2$  levels. We provide evidence that TGF- $\beta$ 2-driven  
71 catalase activity regulates the  $H_2O_2$  redox balance that impacts directly not only on  
72 the hyper-dissemination phenotype of *Theileria*-transformed macrophages, but also  
73 on the metastatic potential of human lung and colon cancer cell lines.

## 74 **Results**

75 ***T. annulata*-transformed macrophages attenuated for dissemination display**  
76 **significantly less catalase activity compared to virulent hyper-invasive**  
77 **macrophages.**

78 We previously showed that attenuation of *Theileria*-transformed macrophage  
79 virulence correlates with an increase of  $H_2O_2$  output (5). This appeared counter-  
80 intuitive, as one imagined that a decrease in infected macrophage virulence would be

## TGF- $\beta$ 2 and catalase activity

81 accompanied by a reduction in their oxidative stress status. However, accumulation of  
82 H<sub>2</sub>O<sub>2</sub> can occur either due to an increase in superoxide dismutase (SOD) activity that  
83 produces H<sub>2</sub>O<sub>2</sub>, or reduced detoxification of H<sub>2</sub>O<sub>2</sub> leading to its accumulation. In  
84 order to discriminate between these two possibilities SOD and catalase activities were  
85 measured in virulent (V) and attenuated (A) *Theileria*-transformed macrophages  
86 (Figure 1). No significant change in SOD activity was detected between virulent and  
87 attenuated macrophages (Fig. 1A), whereas catalase activity was significant  
88 diminished in attenuated macrophages (Fig. 1B). Moreover, decreased catalase  
89 protein levels underpinned the reduced catalase activity of attenuated macrophages  
90 (Fig. 1C). Catalase activity was also measured in *Theileria*-transformed macrophages  
91 isolated from disease-resistant Sahiwal cattle and found to be lower (Fig.S1A). Thus,  
92 attenuated macrophages isolated from disease-susceptible animals resemble  
93 transformed macrophages isolated from disease-resistant animals with respect to  
94 catalase activity.

### 95 **TGF $\beta$ -2 stimulates *catalase* transcription leading to an increase in protein levels** 96 **and catalase activity.**

97 We examined if the decrease in TGF- $\beta$ 2 levels underpinned loss of catalase  
98 transcription and activity. When attenuated macrophages were stimulated with  
99 recombinant TGF- $\beta$ 2 *catalase* transcription is increased, but not that of *glutathione*  
100 *peroxidase*, coding for another antioxidant enzyme (Figure 2A). Stimulation of  
101 attenuated macrophages with recombinant TGF- $\beta$ 2 increased catalase activity (Fig.  
102 2B) and decreased H<sub>2</sub>O<sub>2</sub> output (Fig. 2C). Taken together, TGF- $\beta$ 2-signalling clearly  
103 activates *catalase* transcription leading to increased amounts of catalase and greater  
104 catabolic activity towards H<sub>2</sub>O<sub>2</sub>.

TGF- $\beta$ 2 and catalase activity

105 **TGF- $\beta$ 2-signalling activates *catalase* transcription via CREB.**

106 CREB is a transcription factor that binds DNA on CRE sites (cAMP response  
107 element) to regulate transcription of target genes, and in *Theileria*-transformed  
108 macrophages TGF- $\beta$ 2-signalling activates *CREB* transcription (8). Consistently,  
109 bioinformatic analyses detected CRE sites in the promoter region of the *catalase* gene  
110 (data not shown). Inhibition of CREB-mediated transcription with a specific CREB-  
111 CBP interaction inhibitor decreased *catalase* transcription and catalase activity to  
112 levels characteristic of attenuated macrophages (Figure 3A & B). Consequently,  
113 virulent macrophages produce H<sub>2</sub>O<sub>2</sub> equivalent to attenuated levels and conversely,  
114 decreased H<sub>2</sub>O<sub>2</sub> output occurred upon activation of CREB-mediated transcription  
115 following stimulation of attenuated macrophages with membrane-permeable db-  
116 cAMP (Fig. 3C). Importantly, pre-treatment of attenuated macrophages with the  
117 CREB inhibitor prevented the drop in H<sub>2</sub>O<sub>2</sub> levels provoked by addition of db-cAMP  
118 (Fig. 3C). Thus, TGF- $\beta$ 2-signalling via CREB activates *catalase* transcription leading  
119 to increased catalase activity and reduced H<sub>2</sub>O<sub>2</sub> output.

120 **Virulence and attenuation of *Theileria*-transformed macrophages depends on**  
121 **their redox balance.**

122 *T. annulata* transforms host macrophages into tumour-like cells that have heightened  
123 motility and invasiveness two traits that are typical of metastatic/disseminating cancer  
124 cells. Figure 4 shows that detoxifying H<sub>2</sub>O<sub>2</sub> by adding catalase, or TGF- $\beta$ 2 to  
125 attenuated macrophages induces a regain in cell migration by *Theileria*-transformed  
126 macrophages. Boiling catalase to inactive the enzyme ablated its ability to reduce  
127 H<sub>2</sub>O<sub>2</sub> levels that stimulate migration. By contrast, increasing H<sub>2</sub>O<sub>2</sub> output by virulent  
128 macrophages via SB431542 blockade of TGF-R attenuated their migration (Fig. 4).

## TGF- $\beta$ 2 and catalase activity

129 Similarly, TGF-R blockade with SB431542 or inhibition of catalase activity with  
130 AminoTriazole (AT) reduced matrigel traversal of virulent macrophages to levels  
131 typical of attenuated macrophages (Fig.4B). Therefore, modifying transformed  
132 macrophage redox balance via TGF- $\beta$ 2 stimulation, or manipulating catalase activity  
133 changes a virulence trait (heightened migration) of *Theileria*-transformed  
134 macrophages.

### 135 **TGF $\beta$ -2 stimulation also increases catalase activity and metastatic potential of** 136 **human lung and colon cancer cell lines.**

137 In order to extend our observations on *Theileria*-transformed macrophages to other  
138 cancer cell types, we treated HT-29 (human colorectal adenocarcinoma) and A549  
139 (adenocarcinomic human alveolar basal epithelial) cell lines with TGF-R and/or  
140 CREB-CBP interaction inhibitors. Both HT-29 and A549 H<sub>2</sub>O<sub>2</sub> levels increase  
141 following inhibitor treatment due to a corresponding drop in catalase activity (Figure  
142 5 A& B), similar to *Theileria*-transformed macrophages (Figures 2, 3 & FigS1).  
143 Moreover, inhibition of TGF-R and/or CREB signalling decreases matrigel traversal  
144 of A549 cells (Fig. 5C). The ensembles lead to the conclusion that TGF- $\beta$ 2 regulation  
145 of catalase activity via CREB-mediated transcription and their impact on H<sub>2</sub>O<sub>2</sub>-type  
146 oxidative stress is common to different cancer cell types of human and bovine origin.

### 147 **Discussion**

148 In this study, we have demonstrated that TGF- $\beta$ 2 induces CREB to drive *catalase*  
149 transcription, leading to more catalase enzyme and hence activity to detoxify H<sub>2</sub>O<sub>2</sub>.  
150 *Theileria*-transformed macrophages with attenuated dissemination potential are  
151 characterized by decreased TGF- $\beta$ 2 production, and consequently, reduced catalase  
152 activity and increased H<sub>2</sub>O<sub>2</sub> output. Stimulating attenuated macrophages with

### TGF- $\beta$ 2 and catalase activity

153 exogenous TGF- $\beta$ 2 increased catalase activity and decreased H<sub>2</sub>O<sub>2</sub> output leading to a  
154 regain in their capacity to migrate and traverse matrigel. In contrast, blockade of  
155 either TGF-R or CREB binding to CBP decreased catalase activity and increased  
156 H<sub>2</sub>O<sub>2</sub> output led to a reduced migratory and matrigel traversal capacity of virulent  
157 macrophages. These observations are not restricted to *Theileria*-transformed bovine  
158 macrophages, but were shared by human A549 and HT-29 cancer cell lines, where  
159 inhibition of TGF- $\beta$ 2-signalling and/or CREB-mediated transcription again decreased  
160 catalase activity, increased the H<sub>2</sub>O<sub>2</sub> output and reduced their capacity to traverse  
161 matrigel. Thus, our demonstration that catalase activity and hence H<sub>2</sub>O<sub>2</sub> levels are  
162 regulated by TGF- $\beta$ 2-signaling can be generalized to different types of tumours.

163 Our study is consistent with a pro-metastatic role for TGF- $\beta$ 2, since adding back  
164 recombinant TGF- $\beta$ 2 to attenuated macrophages resulted in a regain in their migratory  
165 and dissemination potentials. Clearly, one way that TGF- $\beta$ 2 promotes virulent  
166 dissemination is by inducing CREB transactivation to activate catalase and detoxify  
167 excess H<sub>2</sub>O<sub>2</sub>. Tumours produce large amounts of ROS that cause damage to DNA,  
168 proteins and lipids and we propose that infected macrophages attenuated for  
169 dissemination have countered the tumorigenic effect of *Theileria* by producing higher  
170 levels of H<sub>2</sub>O<sub>2</sub>. In virulent macrophages with high TGF- $\beta$ 2 levels CREB induction  
171 activates catalase that dampens H<sub>2</sub>O<sub>2</sub> output and similarly TGF- $\beta$ 2-mediated changes  
172 H<sub>2</sub>O<sub>2</sub> output and catalase activity impact on the metastatic potential of human A549  
173 and HT-29 cancer cell lines. This argues that many tumours of different origins  
174 exploit TGF- $\beta$ 2-driven *catalase* expression to control their H<sub>2</sub>O<sub>2</sub> redox balance.



TGF- $\beta$ 2 and catalase activity

175 **MATERIALS AND METHODS**

176 **Cell culture:** virulent Ode macrophage line (12) corresponds to passage 62 and  
177 attenuated macrophages correspond to passage 309. All macrophages were maintained  
178 in RPMI medium supplemented with 10% fetal bovine serum (FBS), 2 mM L-  
179 glutamine, 100U penicillin, 0.1 mg/ml streptomycin, and HEPES. The cell lines S2,  
180 S3 and H7–H8 have been described previously (13). Cells were maintained in the  
181 above culture medium with 50  $\mu$ M of  $\beta$ -mercaptoethanol. The human colon  
182 adenocarcinoma cell line HT-29 was maintained in McCoy's medium supplemented  
183 with 10% FBS. A549 human lung adenocarcinoma cells (ATCC, CCL-185) were  
184 cultured in DMEM/RPMI (1:1) with 10% fetal bovine serum. All the cells were  
185 incubated at 37°C with 5% CO<sub>2</sub>.

186 **Total RNA extraction and reverse transcription:** Total RNA of *Theileria*-infected  
187 macrophages was isolated using the RNeasy mini kit (Qiagen) according to the  
188 manufacturer's instructions. The quality and quantity of RNA was measured by  
189 Nanodrop spectrophotometer. For reverse transcription, 1 $\mu$ g isolated RNA was  
190 diluted in water to a final volume of 12 $\mu$ L, warmed at 65°C for 10 min, then  
191 incubated on ice for 2 min. Afterwards, 8 $\mu$ l of reaction solution (0.5 $\mu$ L random  
192 hexamer, 4 $\mu$ L 5x RT buffer, 1.5 $\mu$ L 10mM dNTP, 1 $\mu$ L 200U/ $\mu$ LRT-MMLV  
193 (Promega) and 1 $\mu$ L 40U/ $\mu$ L RNase inhibitor (Promega) was added to get a final  
194 reaction volume of 20 $\mu$ L and incubated at 37°C for 2 h. The resultant cDNA was  
195 stored at -20°C.

196 **Quantitative polymerase chain reaction (qPCR):** mRNA expression levels were  
197 estimated by qPCR on Light Cycler 480 (Roche) using SYBR Green detection  
198 (Thermo). *GAPDH* was used as internal control to normalize for mRNA levels. The

## TGF- $\beta$ 2 and catalase activity

199 detection of a single product was verified by dissociation curve analysis and relative  
200 quantities of mRNA calculated using the method described (14).

201 **Pharmaceutical inhibition and activation:** TGF- $\beta$  signalling was inhibited using the  
202 TGF-Receptor I/ALK5 inhibitor SB431542, 10 $\mu$ M (Sigma #S4317) and activated by  
203 adding 5ng/ml of recombinant bovine TGF- $\beta$ 2 (NIBSC, Potters Bar. UK). Cells were  
204 treated for 24 h at 37°C. Catalase activity was ablated with a selective inhibitor  
205 Aminotriazole (AT) (Sigma, A8056), and restored by adding bovine catalase (Sigma,  
206 C4963-2MG). Cells were treated overnight at a concentration of 1200 $\mu$ M with AT  
207 and 80U/ml of bovine catalase. For inhibiting CREB transcription, a cell-permeable  
208 naphthamide compound that effectively blocks the interaction between the KIX  
209 domain of CBP and the KID domain of CREB was used (Calbiochem, CAS 92-78-4)  
210 at a concentration of 25 $\mu$ M for 1 h at 37°C with 5% CO<sub>2</sub>.

211 **Western Blotting:** Cells were harvested and extracted by lysis buffer (20mM Hepes,  
212 Nonidet P40 (NP40) 1%, 0.1% SDS, 150mM NaCl, 2mM EDTA, phosphatase  
213 inhibitor cocktail tablet (PhosSTOP, Roche) and protease inhibitor cocktail tablet  
214 (Complete mini EDTA free, Roche). Protein concentration was determined by the  
215 Bradford protein assay. Cell lysates were subjected to Western blot analysis using  
216 conventional SDS/PAGE and protein transfer to nitrocellulose filters (Protran,  
217 Whatman). The membrane was blocked by 5% non-fat milk-TBST (for anti-catalase),  
218 or 3% non-fat milk-PBST (for anti-actin antibody) for 90 min at room temperature  
219 (RT).

220 Antibodies used in immunoblotting were as follows: rabbit polyclonal antibody anti-  
221 catalase (Cell Signaling) and goat polyclonal antibody anti-actin (I-19, Santa Cruz  
222 Biotechnology). Membranes were incubated with peroxidase-conjugated secondary  
223 antibody (rabbit anti-IgG and goat anti-IgG (Santa Cruz biotechnology). After

## TGF- $\beta$ 2 and catalase activity

224 washing, proteins were visualized with ECL western blotting detection reagents  
225 (Thermo Scientific) on X-ray films. The level of  $\beta$ -actin was used as a loading control  
226 throughout.

227 **Dynamic monitoring of cell migration with the xCELLigence system:** Cell  
228 migration assay was assessed using the xCELLigence system (Roche). Medium was  
229 added to the bottom chamber of the CIM-Plate 16. The CIM-Plate 16 was assembled  
230 by placing the top chamber coated with Matrigel (BD) onto the bottom chamber and  
231 snapping the two together. Serum-free medium was placed in the top chamber to  
232 hydrate and the membrane was pre-incubated for 1 hour in the CO<sub>2</sub> incubator at 37  
233 °C. Once the CIM-Plate 16 has equilibrated, it is placed in the RTCA DP station and  
234 the background cell-index values are measured. The CIM-Plate 16 is then removed  
235 from the RTCA DP station and the cells passaged 24h in serum free medium were  
236 added to the top chamber. The CIM-Plate 16 is placed in the RTCA DP station and  
237 migration is monitored for several hours.

238 **Matrigel chambers assay:** The invasive capacity of transformed cells was assessed  
239 *in vitro* using Matrigel migration chambers, as described (15). Culture coat 96-well  
240 medium BME cell invasion assay was obtained from Cultrex instructions (3482-096-  
241 K). After 24 h of incubation at 37°C, each well of the top chamber was washed once  
242 in buffer. The top chamber was placed back on the receiver plate. 100 $\mu$ L of cell  
243 dissociation solution/Calcein AM were added to the bottom chamber of each well,  
244 incubated at 37°C for 1 h to fluorescently label cells and dissociate them from the  
245 membrane before reading at 485 nm excitation, 520 nm emission using the same  
246 parameters as the standard curve.

247 **Intracellular levels of hydrogen peroxide (H<sub>2</sub>O<sub>2</sub>):** 1 $\times$ 10<sup>5</sup> cells were seeded in 96  
248 well plates and incubated 18h in complete medium. Cells were washed in PBS and

## TGF- $\beta$ 2 and catalase activity

249 incubated with 100 $\mu$ L per well of 5 $\mu$ M H<sub>2</sub>-DCFDA diluted in PBS (Molecular  
250 Probes). H<sub>2</sub>O<sub>2</sub> levels were assayed by spectrofluorimetry on a fusion  
251 spectrofluorimeter (PackardBell). Fluorescence intensity was recorded every hour  
252 over a period of 5 h. Excitation and emission wavelengths used for H<sub>2</sub>O<sub>2</sub> were 485  
253 and 530nm. The number of cells was evaluated by the crystal violet assay. Cells were  
254 stained in 0.05% crystal violet and 2% ethanol in PBS for 30 min at room  
255 temperature. After four washes in PBS, the stain was dissolved in methanol and  
256 measured at 550nm on Fusion. The level of H<sub>2</sub>O<sub>2</sub> was calculated in each sample as  
257 follows: reactive oxygen species rate (arbitrary unitsmin<sup>-1</sup>10<sup>5</sup> cells<sup>-1</sup>) = [fluorescence  
258 intensity (arbitrary units) at T300 minutes – fluorescence intensity (arbitrary units) at  
259 T0] per 60min per number of cells as measured by the crystal violet assay.

260 **Catalase activity assay:** A dry pellet of 1 $\times$ 10<sup>5</sup> cells was lysed in 50 $\mu$ L PBS, 1%  
261 NP40. 50 $\mu$ L of lysate, 50 $\mu$ L of anti-peroxydase antibody (1/2000, Sigma) and 50 $\mu$ L  
262 H<sub>2</sub>O<sub>2</sub> (1/4000, Sigma) were added to a 96-well plate and incubated for 10 min at 37°C  
263 in 5% CO<sub>2</sub>. 50 $\mu$ L of OPD (SIGMAFAST™, #P9187) was then added and the  
264 absorbance immediately read at 405nm. Catalase activity assay was assayed on  
265 Fusion. Catalase measurement was reported to the amount of protein in each sample  
266 (bovine serum albumin microbiuret assay, Pierce, Bezons, France).

267 **SOD activity:** Superoxide dismutase (SOD) activities of cells were evaluated by the  
268 nitroblue tetrazolium reduction technique according to Beauchamp and Fridovich  
269 (16). SOD measurements were reported to the amount of protein in each sample  
270 (Bradford method was used).

271 **Statistical Analysis:** Data were analyzed with the Student's t-test. All values are  
272 expressed as mean $\pm$ -SEM. Values were considered to be significantly different when  
273 p values were < 0.05.

## TGF- $\beta$ 2 and catalase activity

### 274 **Acknowledgements:**

275 We thank Arnab Pain for fruitful discussion and input when writing the manuscript.

276 MH was supported by a PhD CNR fellowship from the Lebanese government. GL

277 acknowledges support from ANR grant (11 BSV3 01602), Labex ParaFrap (ANR-11-

278 LABX-0024) and core support from INSERM and the CNRS.

### 279 **Competing interests:**

280 The authors declare they have no competing financial interests in relation to the work

281 described.

### 282 **References:**

283 1. Chen W, Ten Dijke P. Immunoregulation by members of the TGFbeta  
284 superfamily. *Nat Rev Immunol.* 2016;16(12):723-40.

285 2. Cantelli G, Crosas-Molist E, Georgouli M, Sanz-Moreno V. TGFbeta-induced  
286 transcription in cancer. *Semin Cancer Biol.* 2016.

287 3. Somerville RP, Adamson RE, Brown CG, Hall FR. Metastasis of *Theileria*  
288 *annulata* macroschizont-infected cells in scid mice is mediated by matrix  
289 metalloproteinases. *Parasitology.* 1998;116 ( Pt 3):223-8.

290 4. Chaussepied M, Janski N, Baumgartner M, Lizundia R, Jensen K, Weir W, et  
291 al. TGF- $\beta$ 2 induction regulates invasiveness of *Theileria*-transformed leukocytes and  
292 disease susceptibility. *PLoS Pathog.* 2010;6(11):e1001197.

293 5. Metheni M, Echebli N, Chaussepied M, Ransy C, Chereau C, Jensen K, et al.  
294 The level of H(2)O(2) type oxidative stress regulates virulence of *Theileria*-  
295 transformed leukocytes. *Cell Microbiol.* 2014;16(2):269-79.

296 6. Annes JP, Munger JS, Rifkin DB. Making sense of latent TGFbeta activation.  
297 *Journal of cell science.* 2003;116(Pt 2):217-24.

298 7. Glasauer A, Chandel NS. Targeting antioxidants for cancer therapy.  
299 *Biochemical pharmacology.* 2014;92(1):90-101.

300 8. Haidar M, Echebli N, Ding Y, Kamau E, Langsley G. Transforming growth  
301 factor beta2 promotes transcription of COX2 and EP4, leading to a prostaglandin E2-  
302 driven autostimulatory loop that enhances virulence of *Theileria annulata*-transformed  
303 macrophages. *Infection and immunity.* 2015;83(5):1869-80.

304 9. Mayford M, Abel T, Kandel ER. Transgenic approaches to cognition. *Curr*  
305 *Opin Neurobiol.* 1995;5(2):141-8.

306 10. Shankar DB, Sakamoto KM. The role of cyclic-AMP binding protein (CREB)  
307 in leukemia cell proliferation and acute leukemias. *Leukemia & lymphoma.*  
308 2004;45(2):265-70.

309 11. Liou GY, Storz P. Reactive oxygen species in cancer. *Free radical research.*  
310 2010;44(5):479-96.

311 12. Singh DK. Methods currently used for the control of *Theileria annulata*: their  
312 validity and proposals for future control strategies. *Parassitologia.* 1990;32(1):33-40.

TGF- $\beta$ 2 and catalase activity

- 313 13. McGuire K, Manuja A, Russell GC, Springbett A, Craigmile SC, Nichani AK,  
314 et al. Quantitative analysis of pro-inflammatory cytokine mRNA expression in  
315 Theileria annulata-infected cell lines derived from resistant and susceptible cattle.  
316 Veterinary immunology and immunopathology. 2004;99(1-2):87-98.
- 317 14. Pfaffl MW. A new mathematical model for relative quantification in real-time  
318 RT-PCR. Nucleic acids research. 2001;29(9):e45.
- 319 15. Lizundia R, Chaussepied M, Huerre M, Werling D, Di Santo JP, Langsley G.  
320 c-Jun NH2-terminal kinase/c-Jun signaling promotes survival and metastasis of B  
321 lymphocytes transformed by Theileria. Cancer research. 2006;66(12):6105-10.
- 322 16. Beauchamp C, Fridovich I. Superoxide dismutase: improved assays and an  
323 assay applicable to acrylamide gels. Analytical biochemistry. 1971;44(1):276-87.

TGF- $\beta$ 2 and catalase activity

324 **Figure legends:**

325 **Figure 1: Catalase activity is decreased in attenuated *Theileria*-transformed**  
326 **macrophages. A.** SOD activity doesn't change between virulent and attenuated  
327 macrophages. **B.** Catalase activity is diminished in attenuated compared to virulent  
328 macrophages. **C top,** Catalase expression is high in virulent macrophages compared  
329 to attenuated macrophages. **C bottom,** Actin expression is unchanged between  
330 virulent and attenuated macrophages. ROS measurements in A and B were done  
331 independently (n = 3) and in triplicate. \*\*p<0.005 compared to attenuated  
332 macrophages.

333 **Figure 2: TGF- $\beta$ 2 activates *catalase* transcription in *Theileria*-transformed**  
334 **macrophages. A.** The transcription of *catalase* and *GPx* is decreased in attenuated  
335 compared to virulent macrophages. Adding recombinant TGF- $\beta$ 2 restores  
336 transcription of *catalase* in attenuated macrophages to virulence levels. No effect was  
337 observed in the transcription level of *GPx*. **B.** Left panel, Catalase activity is down  
338 regulated in attenuated macrophages and rescued by exogenous TGF- $\beta$ 2 stimulation.  
339 **C.** Right panel, H<sub>2</sub>O<sub>2</sub> levels are increased in attenuated compared to virulent  
340 macrophages and is dampened by addition of exogenous TGF- $\beta$ 2. All experiments  
341 were done independently (n = 3) and in triplicate. \* p<0.05 compared to virulent  
342 macrophages; \*\* p<0.005 compared to virulent macrophages; \*\*\* p<0.001 compared  
343 to virulent macrophages; ## p<0.005 compared to attenuated macrophages and ###  
344 p<0.001 compared to attenuated macrophages.

345 **Figure 3: CREB drives *catalase* transcription. A.** *Catalase* transcription is higher in  
346 virulent (V) than attenuated (A) macrophages. Catalase transcription is diminished to  
347 attenuated levels when CREB-mediated transcription in virulent macrophages is

#### TGF- $\beta$ 2 and catalase activity

348 ablated with the specific CREB-CBP interaction inhibitor (25 $\mu$ M 1 h at 37°C). **B.**  
349 Catalase activity is higher in virulent (V) compared to attenuated (A) macrophages,  
350 and CREB-CBP-mediated inhibition of CREB in virulent macrophages reduces  
351 catalase activity to attenuated levels. **C.** H<sub>2</sub>O<sub>2</sub> levels are higher in attenuated (A)  
352 compared to virulent (V) macrophages. CREB-CBP-mediated inhibition of CREB-  
353 driven transcription in virulent macrophages increases the level of H<sub>2</sub>O<sub>2</sub>, while adding  
354 db-cAMP to attenuated macrophages decreases H<sub>2</sub>O<sub>2</sub> output. Treatment with CREB-  
355 CBP interaction inhibitor abolishes *catalase* expression and ablates the increase in  
356 H<sub>2</sub>O<sub>2</sub> induced by db-cAMP stimulation. All experiments were done independently (n  
357 = 3) and in triplicate. \*\* p<0.005 compared to virulent macrophages; \*\*\* p<0.001  
358 compared to virulent macrophages and # p<0.05 compared to attenuated  
359 macrophages.

360 **Figure 4: TGF- $\beta$ 2 levels regulate both oxidative stress and metastatic potential of**  
361 ***Theileria*-transformed macrophages.** **A.** Cell migration index of virulent (V)  
362 macrophages is greater than that of attenuated (A) macrophages, but is reduced upon  
363 TGF-R blockade with SB431542. TGF- $\beta$ 2 stimulation of attenuated macrophages  
364 restores their cell migration index, as does addition of active catalase. Boiled catalase  
365 fails to restore attenuated macrophages migration index. **B.** Matrigel traversal is  
366 higher for virulent (V) than attenuated (A) macrophages. Blocking TGF-R-signalling  
367 with SB431542 diminishes traversal of V macrophages, as does AT-induced  
368 inhibition of catalase activity. All experiments were done independently (n = 3) and in  
369 triplicate. \* p<0.05 compared to virulent macrophages; \*\* p<0.005 compared to  
370 virulent macrophages; \*\*\* p<0.001 compared to virulent macrophages; # p<0.05  
371 compared to attenuated macrophages and # p<0.05 compared to attenuated  
372 macrophages.



TGF- $\beta$ 2 and catalase activity

373 **Figure 5: Observations on *Theileria*-transformed macrophages can be extended**  
374 **to human A549 and HT-29 cancer cell lines. A.** H<sub>2</sub>O<sub>2</sub> levels are lower in HT-29 and  
375 A549 compared to HT-29 and A549 treated with TGF-R inhibitor SB431542. **B.**  
376 Catalase activity is higher in HT-29 and A549 compared to HT-29 and A549 treated  
377 with SB431542. **C.** The metastatic potential as reflected by matrigel traversal of A549  
378 decreased following CBP-induced inhibition of CREB and TGFR blockade by  
379 SB431542. \* p<0.05 compared to HT-29 and HCT-116.

380 **Figure S1:**

381 **TGF- $\beta$ 2 regulates oxidative stress in *Theileria*-transformed macrophages. A and**  
382 **B.** Catalase activity is augmented in independent clones (H7 & H8) of macrophages  
383 isolated from disease-susceptible Holstein-Friesian (H) animals compared to  
384 independent clones (S2 & S3) of macrophages isolated from disease-resistant Sahiwal  
385 (S) animals. SB431542 blockade of TGF-R abolished heightened catalase expression  
386 by independent clonal lines of H macrophages, whereas adding TGF- $\beta$ 2 to  
387 independent clonal lines of S macrophages increased catalase activity. **C.** H<sub>2</sub>O<sub>2</sub> output  
388 is higher in disease-resistant S macrophages compared to disease-susceptible H  
389 macrophages. Blockade of TGF-R-signalling in H macrophages increased levels  
390 H<sub>2</sub>O<sub>2</sub>, while stimulating independent clonal lines of S macrophages with TGF- $\beta$ 2  
391 decreased H<sub>2</sub>O<sub>2</sub> levels. \*\* p<0.005 compared to Holstein macrophages and ## p<0.05  
392 compared to Sahiwal macrophages.

**A**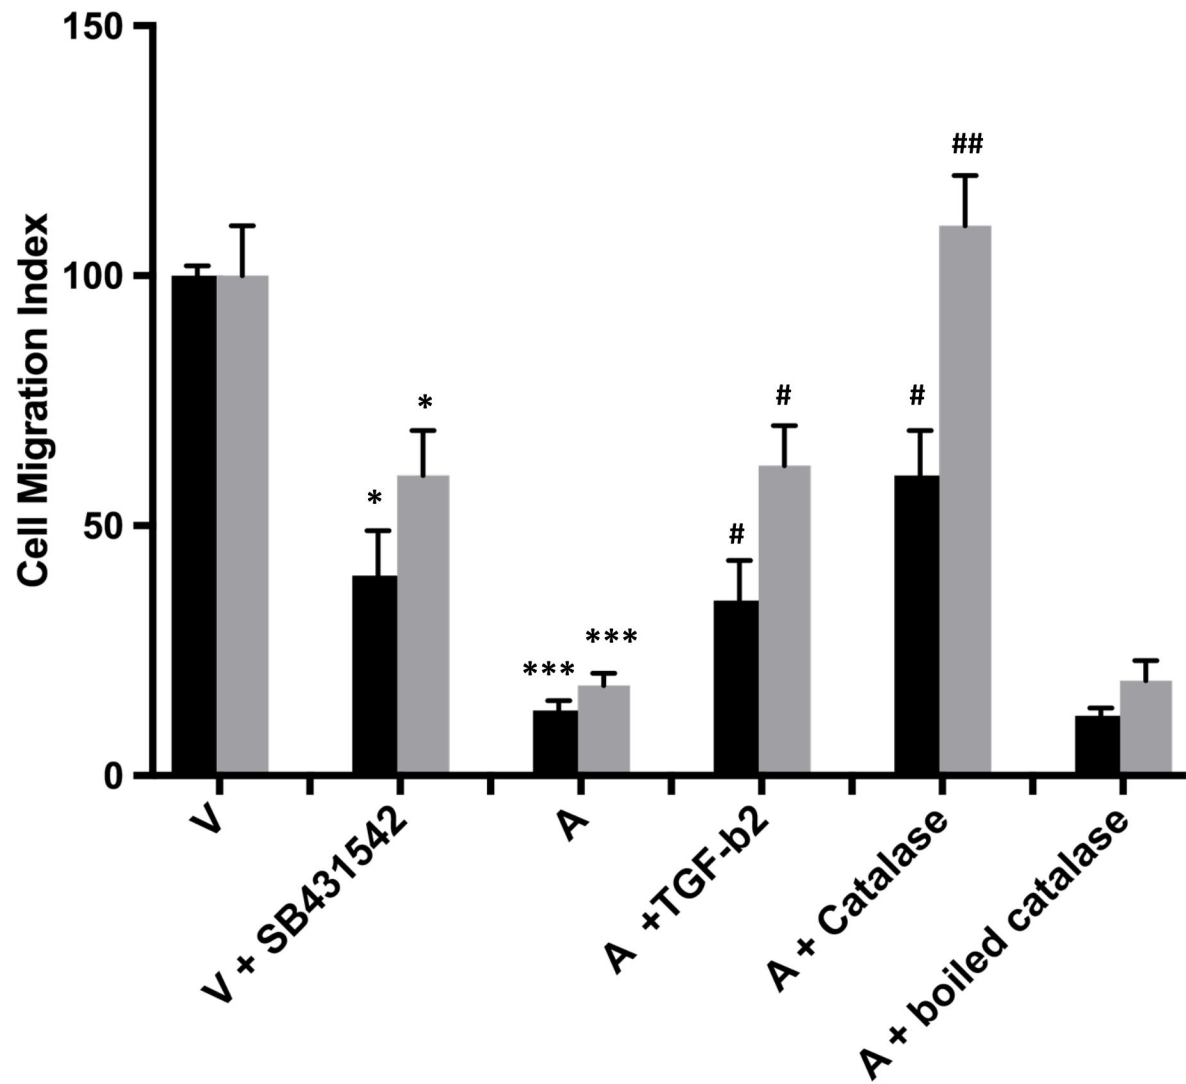**B**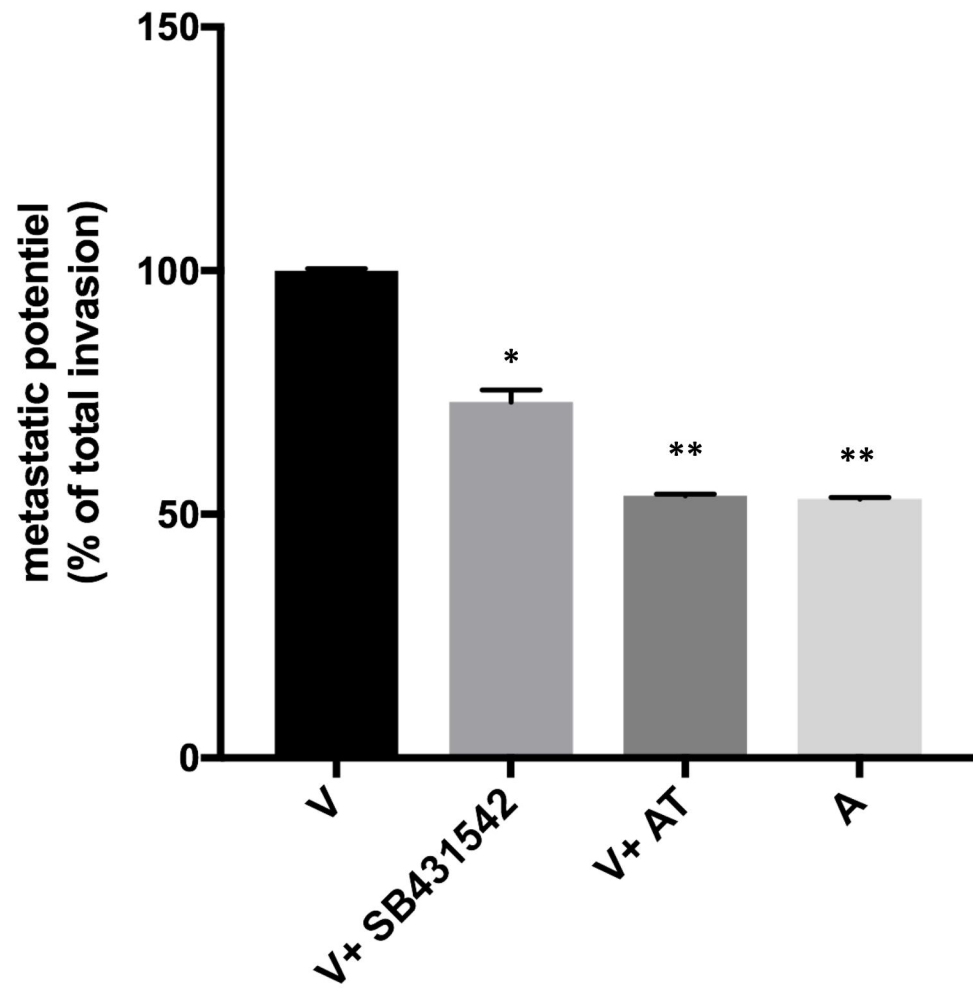

**A**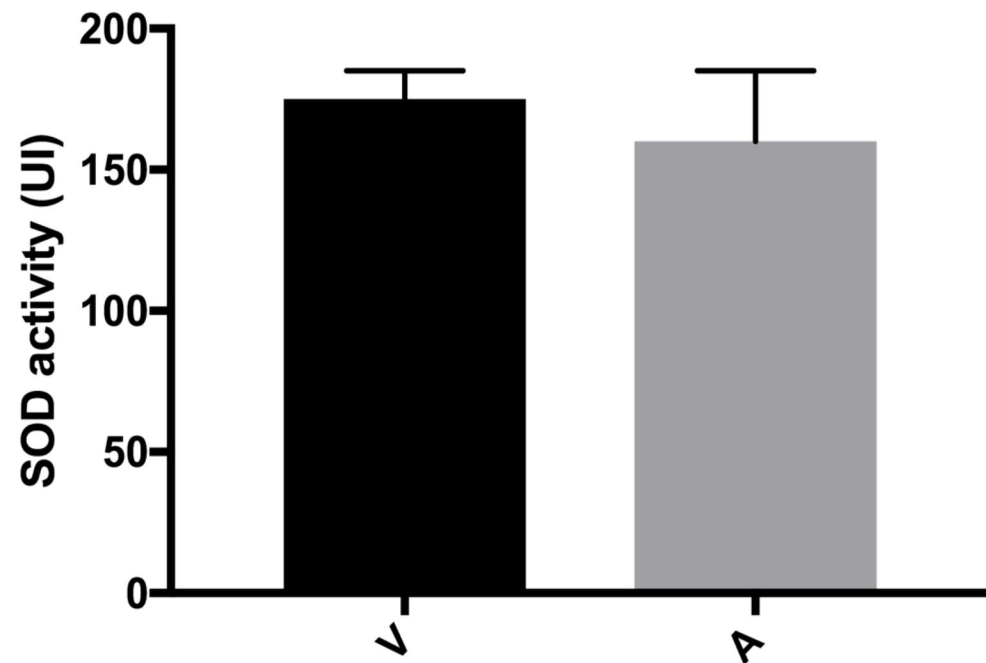**B**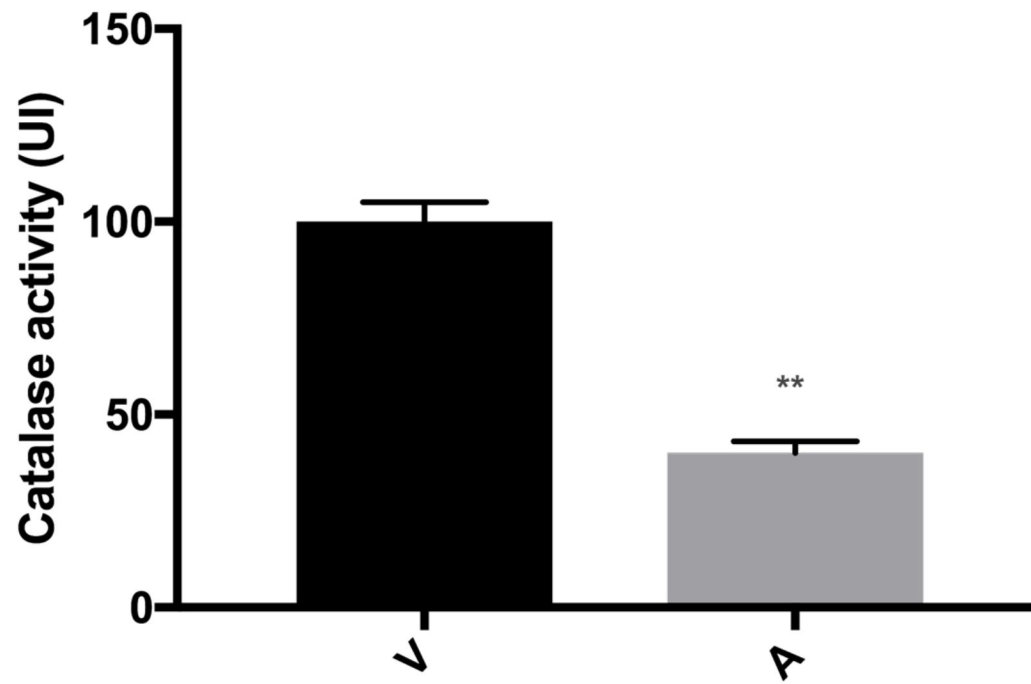**C**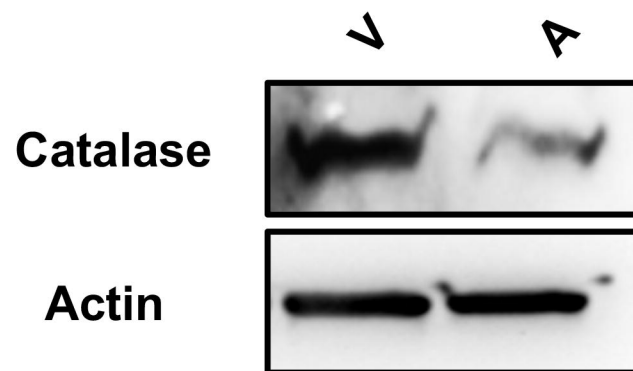

**A**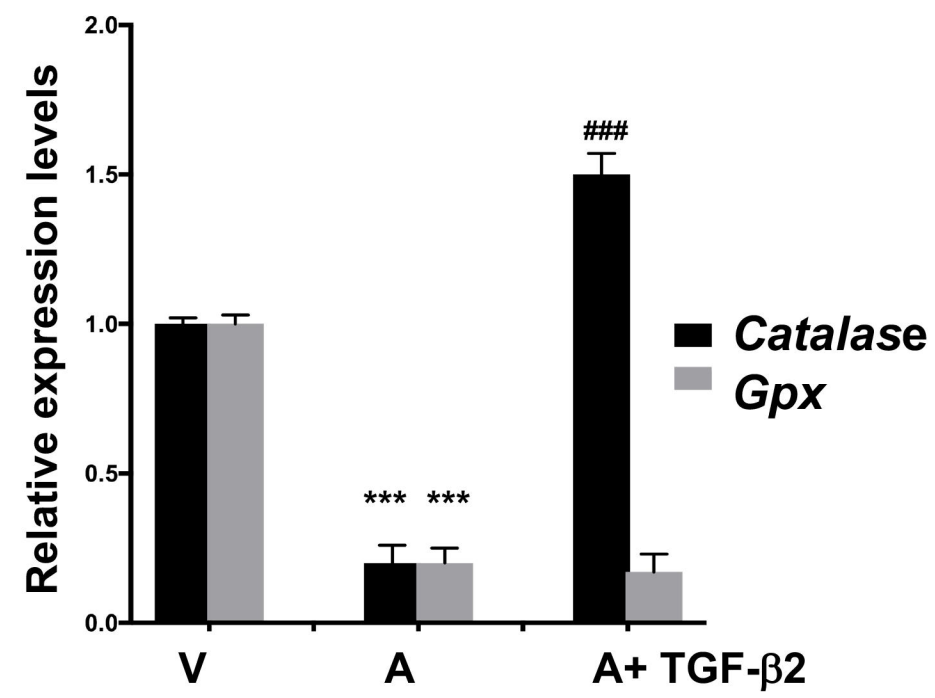**B**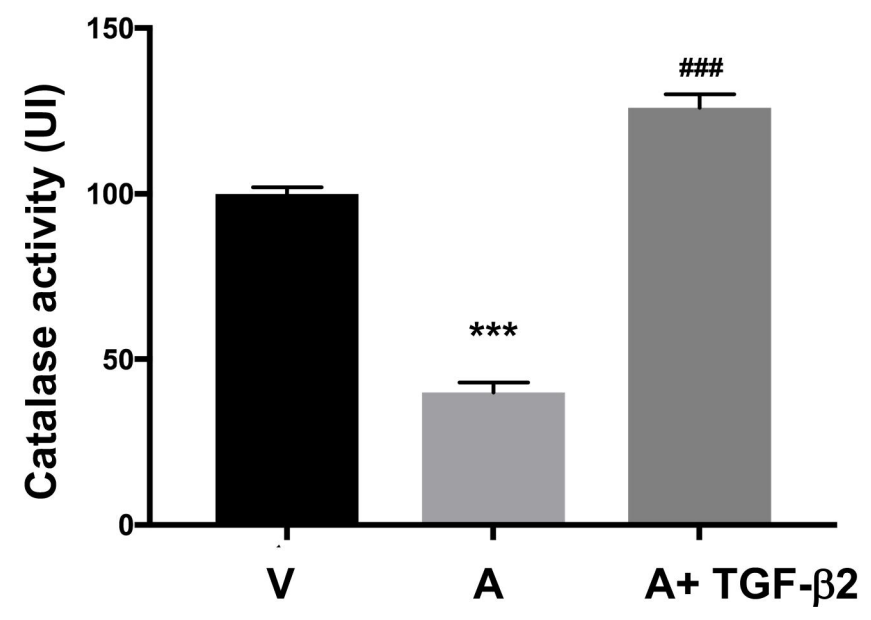**C**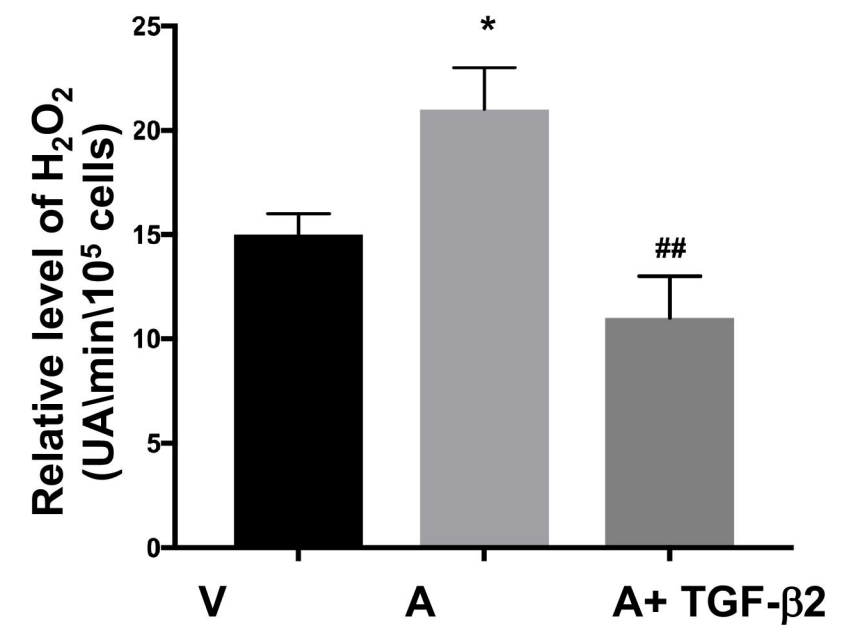

**A**

bioRxiv preprint doi: <https://doi.org/10.1101/467191>; this version posted November 14, 2018. The copyright holder for this preprint (which was not certified by peer review) is the author/funder. All rights reserved. No reuse allowed without permission.

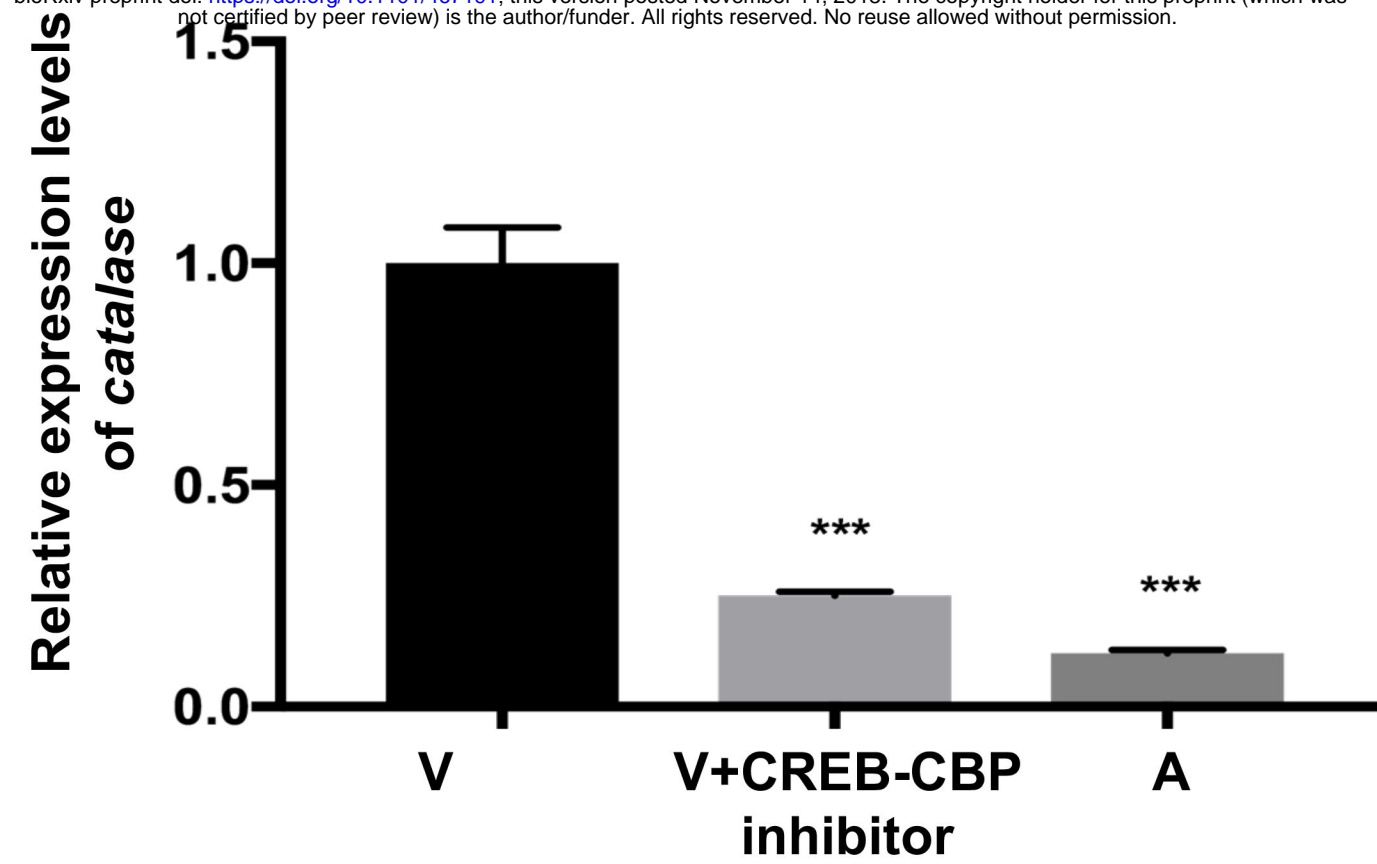**B**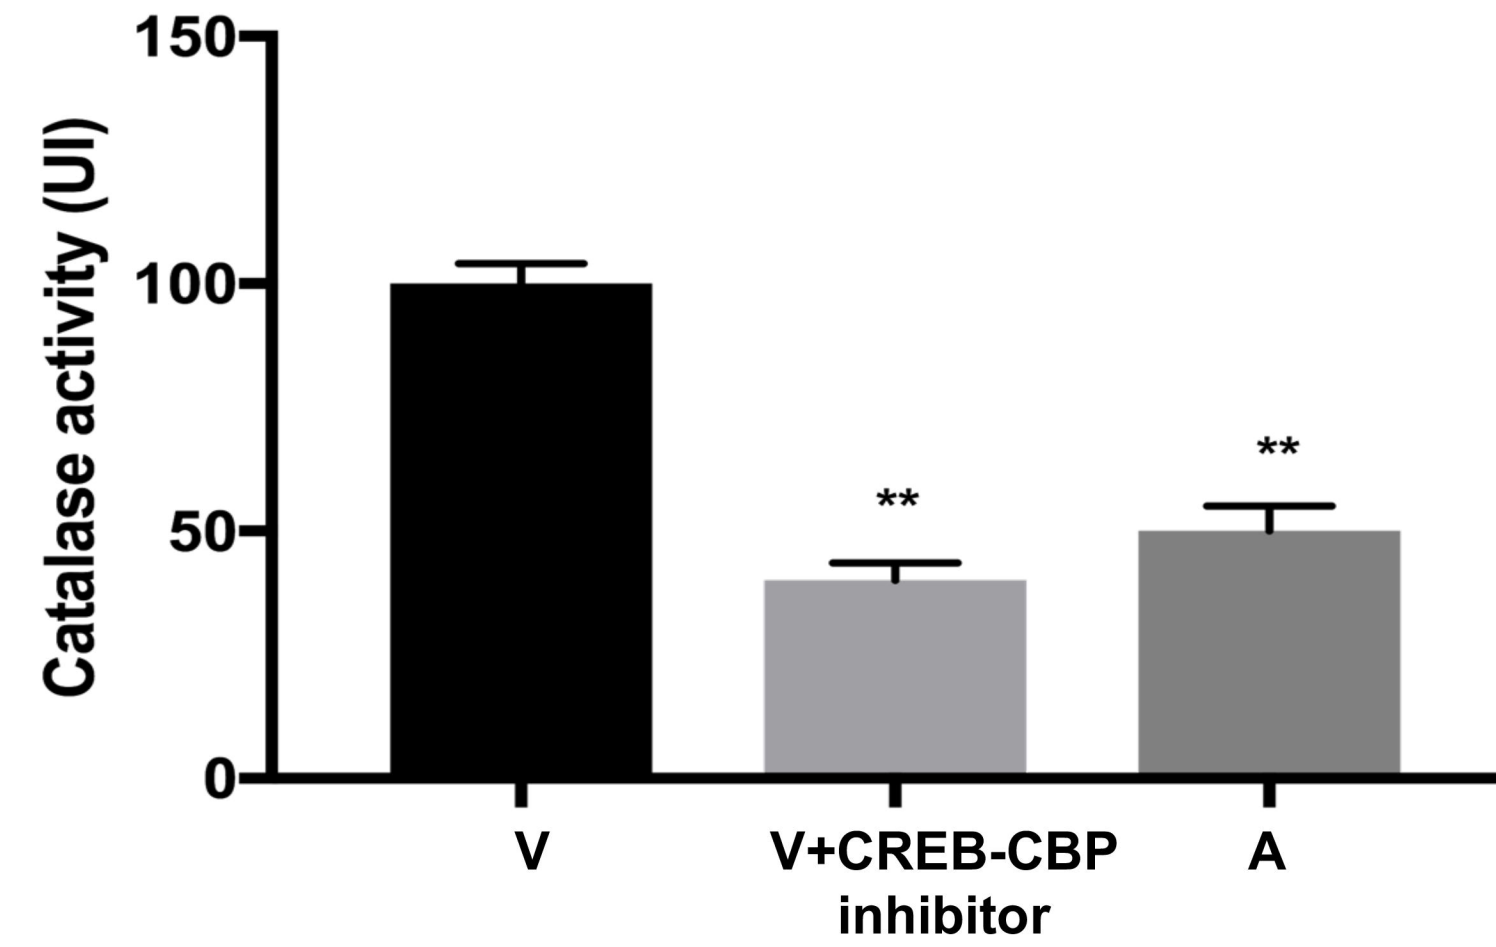**C**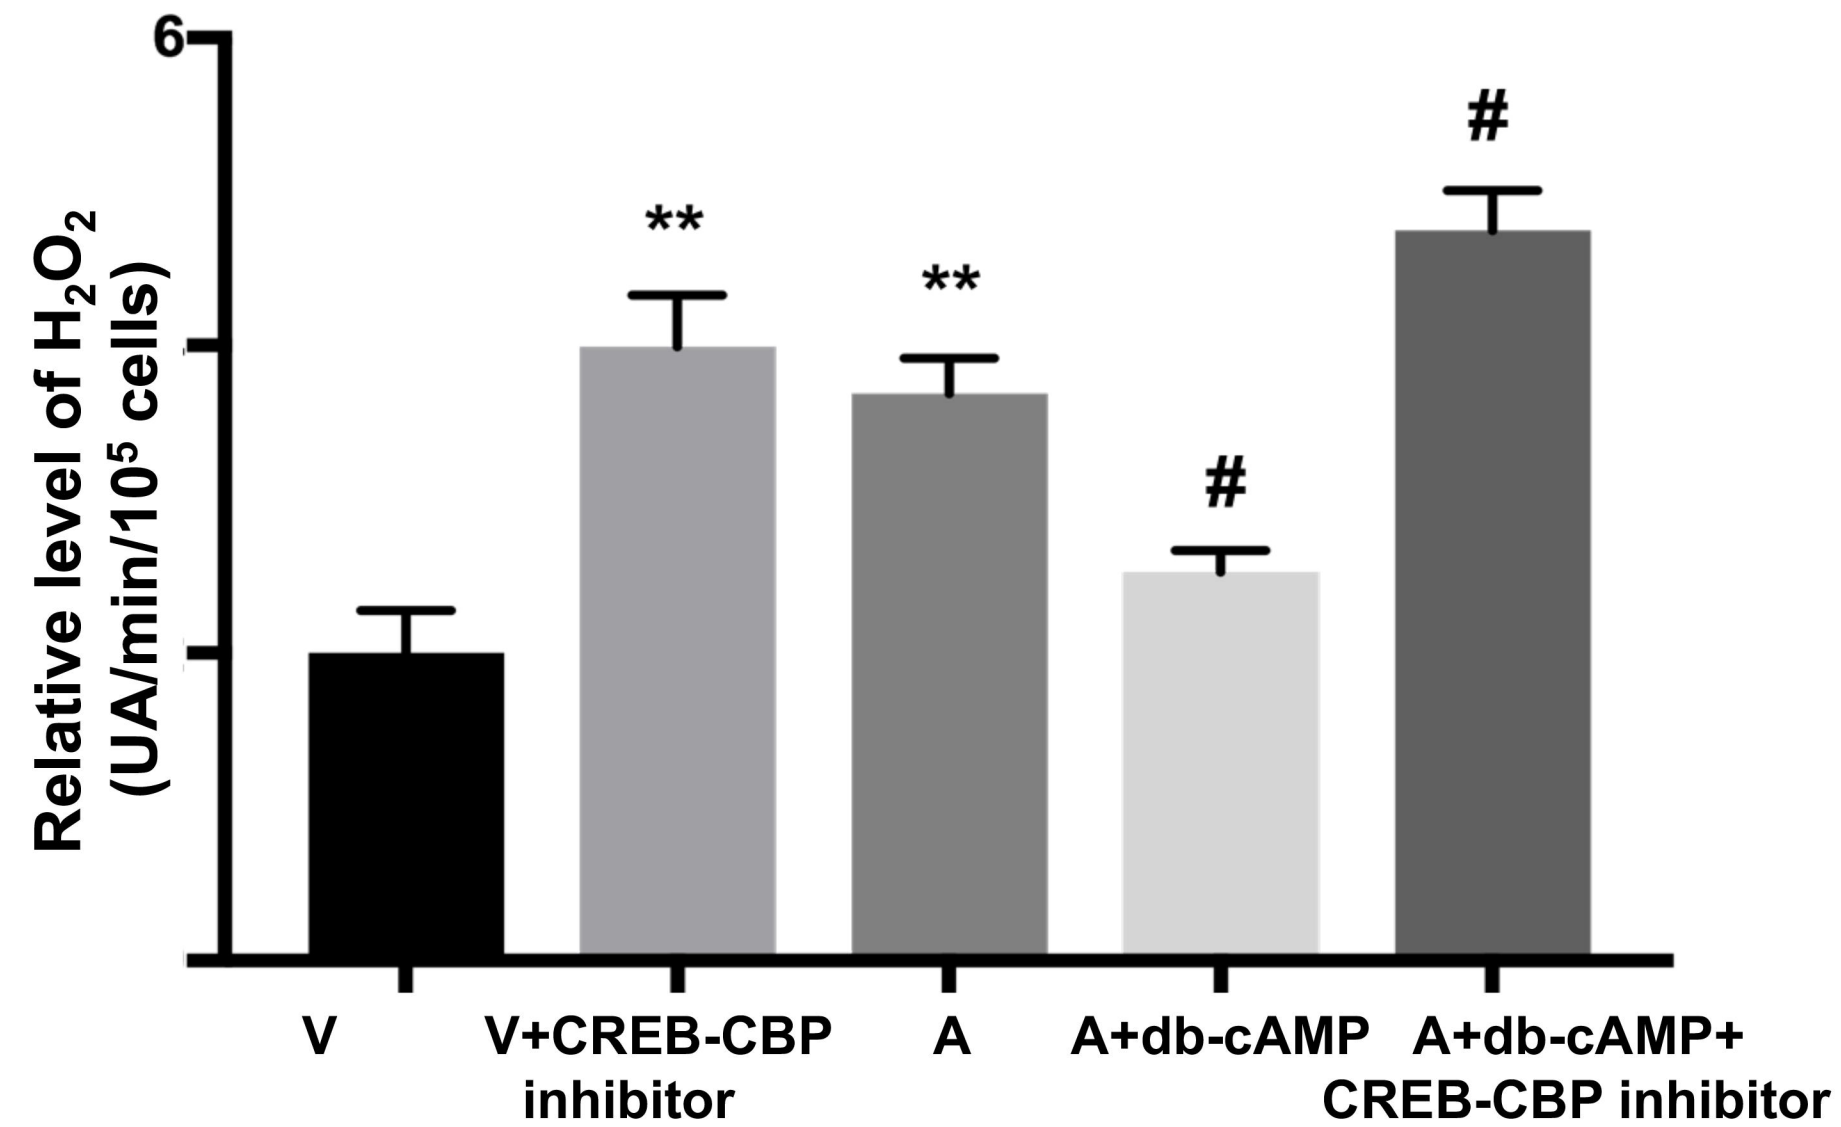

A

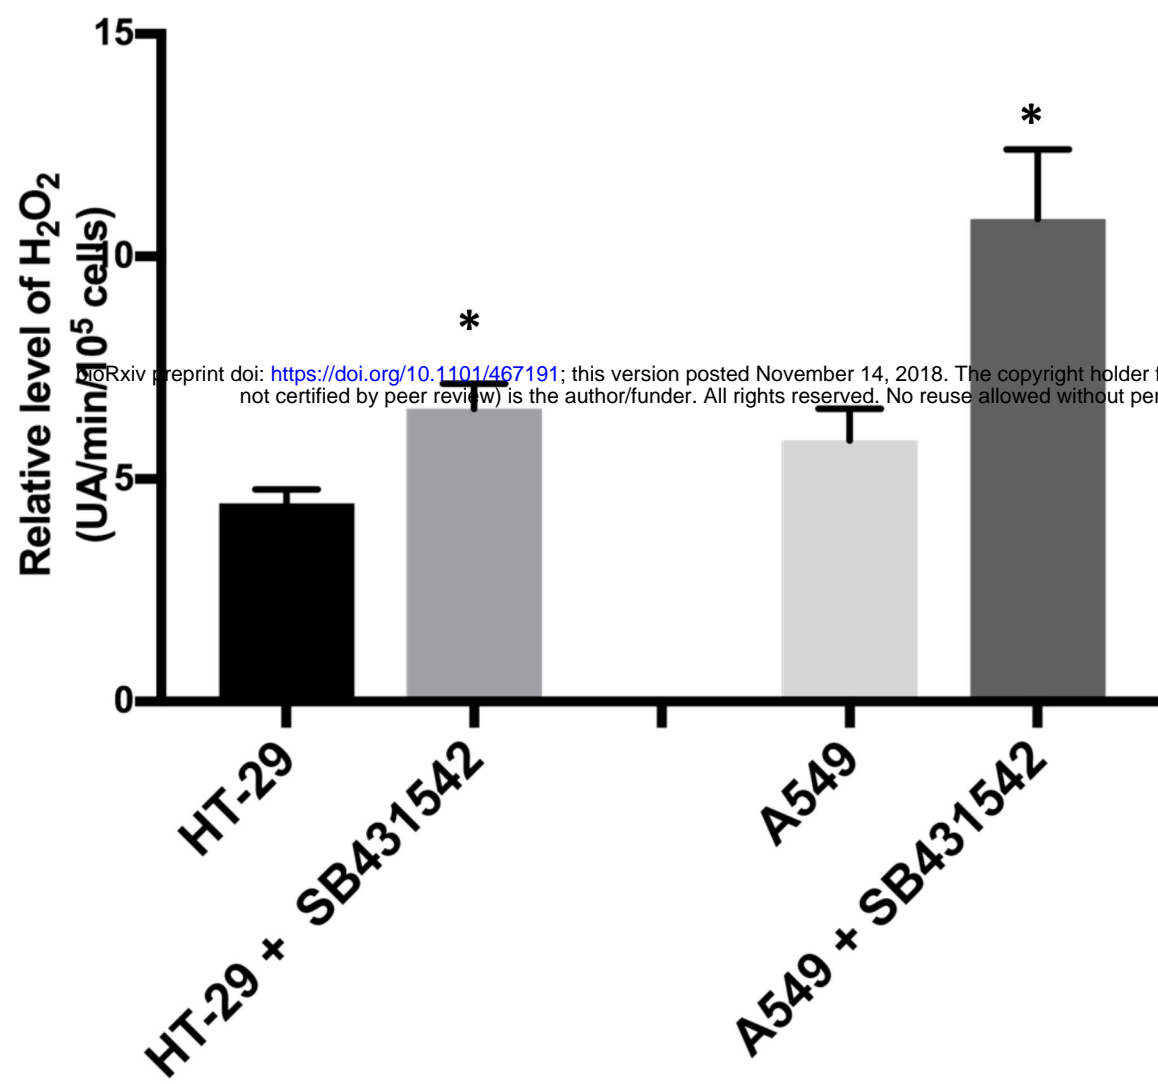

B

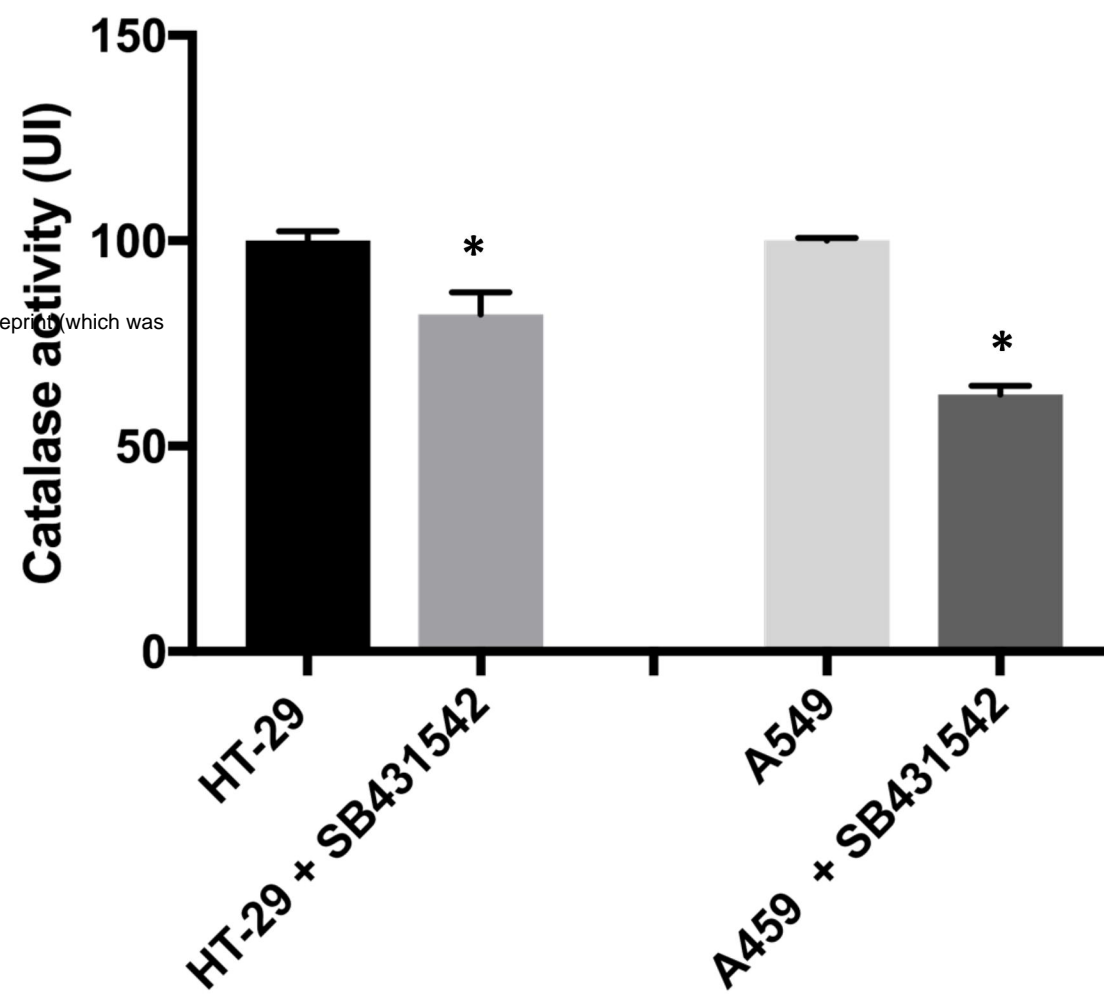

C

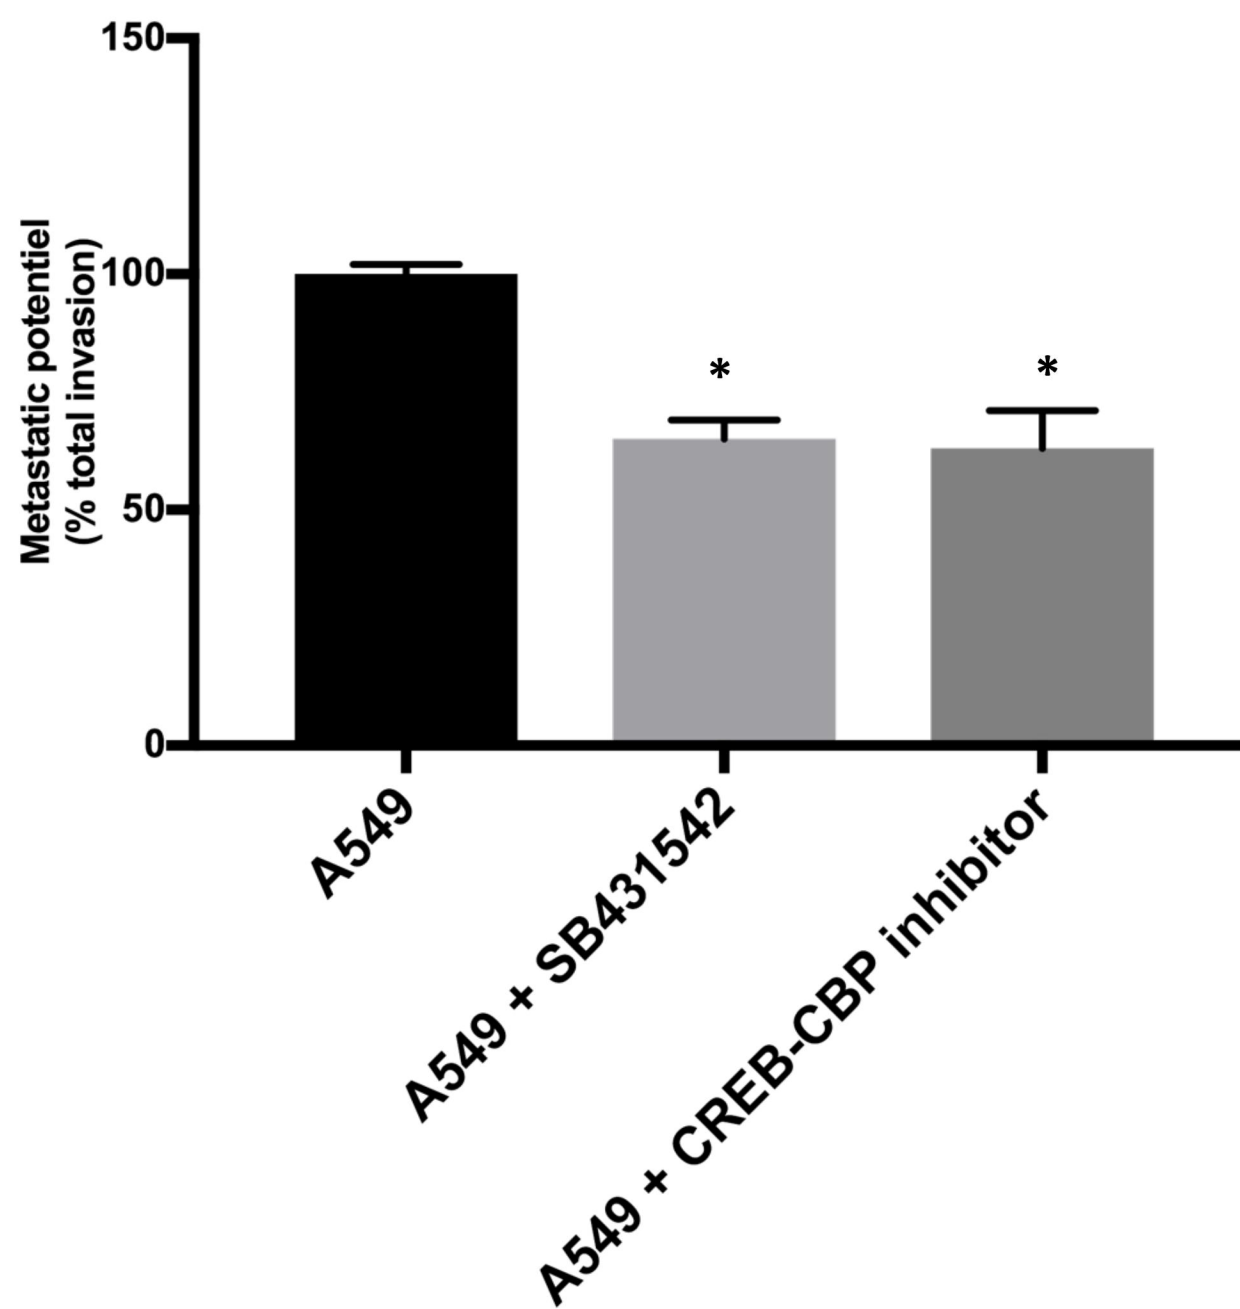

**A**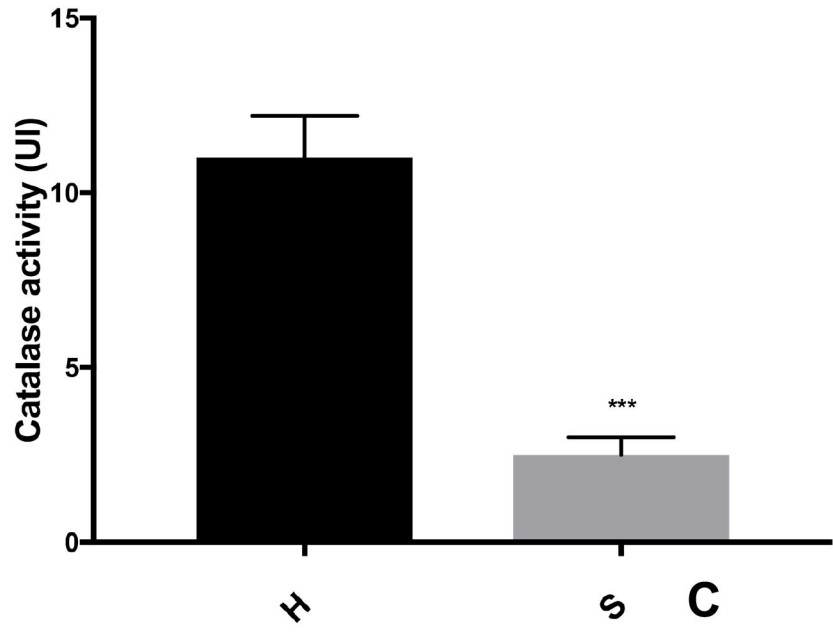**B**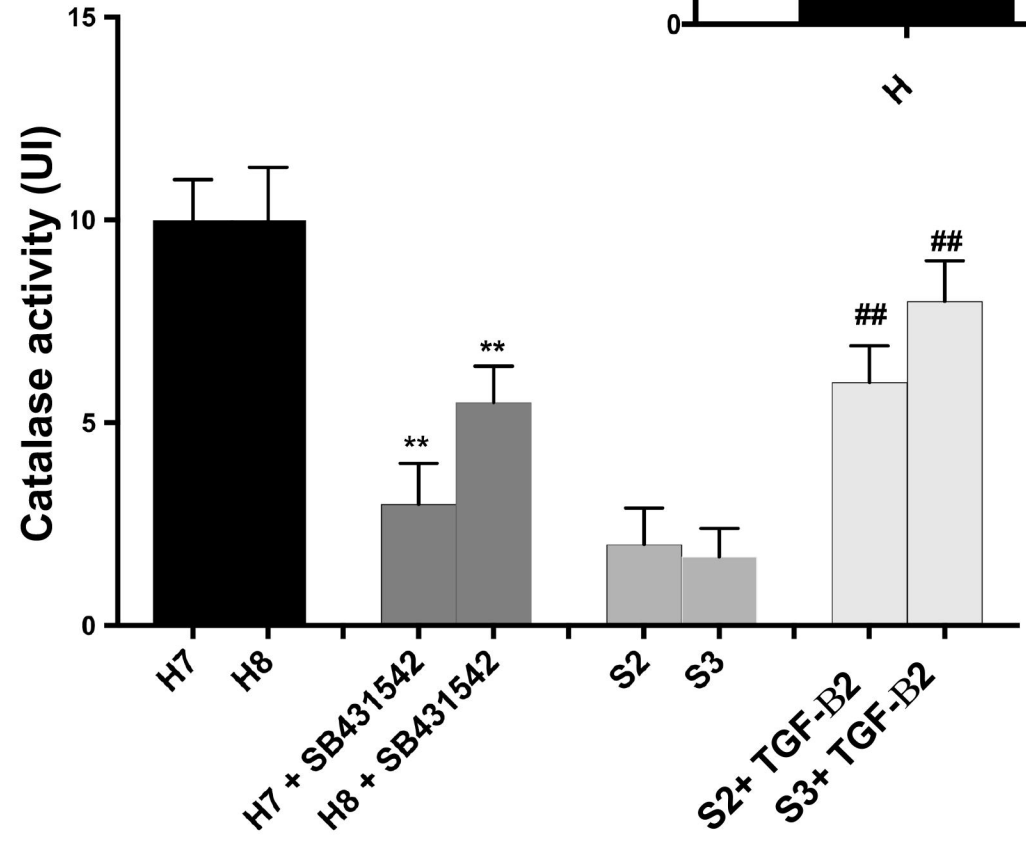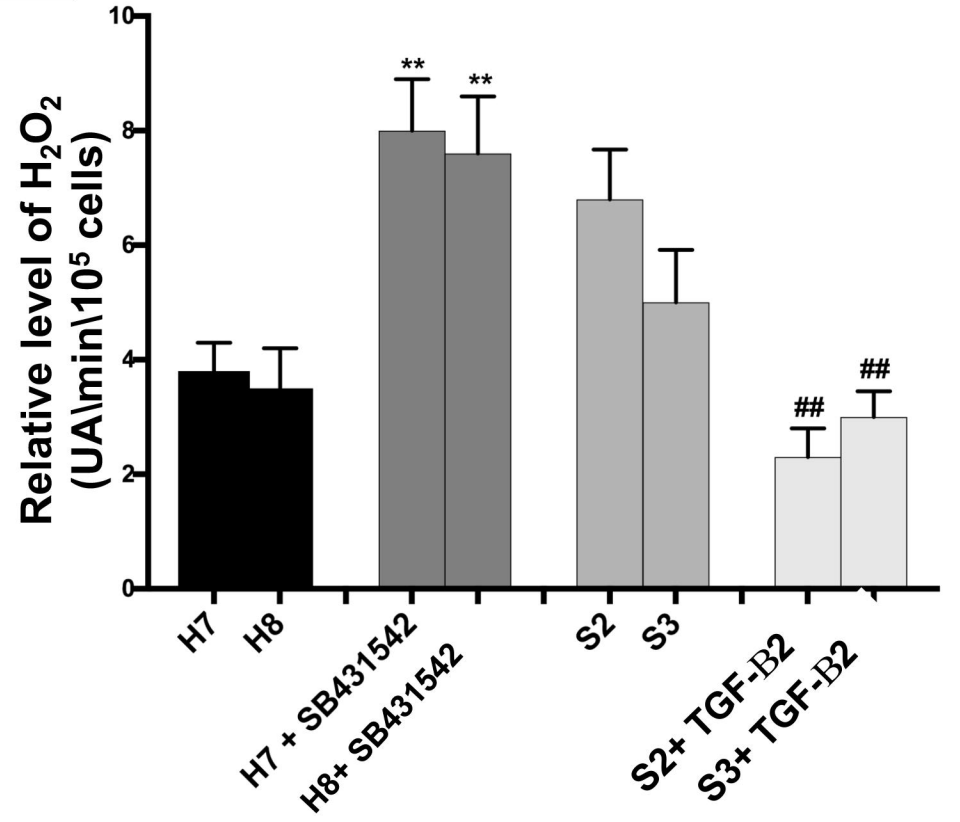

Source: https://www.biorxiv.org/content/10.1101/467191v1.full.pdf
